# Supplementary material for: Lanthanum Diffusion in Fluorapatite at 400 °C, 50 MPa and 4–16 wt %
Source: MDPI journal article supplement (doi:10.3390/separations8060072), 2021-05-21
Supplement: s1 [file s1]

Supplementary Materials

# Lanthanum Diffusion in Fluorapatite at 400 °C, 50 MPa and 4–16 wt %

Xiqiang Liu <sup>1,2</sup> Hui Zhang <sup>1,\*</sup> and Yunlong Liu <sup>3</sup>

**Table S1.** Content of rare earth elements in the micro region of apatite particles (KP03-410, ppm).

| Samples    | La   | Ce   | Pr   | Nd   | Sm   | Eu   | Gd   | Tb   | Dy   | Y    | Ho   | Er   | Tm   | Yb   | Lu   | Hf   | $\Sigma_{RE}$ |
|------------|------|------|------|------|------|------|------|------|------|------|------|------|------|------|------|------|---------------|
| KP03-410-1 | 0.11 | 0.09 | 0.00 | 0.04 | 0.03 | 0.00 | 0.01 | 0.00 | 0.01 | 0.04 | 0.00 | 0.00 | 0.00 | 0.02 | 0.00 | 0.01 | 0.435         |
| KP03-410-2 | 0.12 | 0.07 | 0.00 | 0.02 | 0.00 | 0.00 | 0.02 | 0.00 | 0.01 | 0.03 | 0.00 | 0.00 | 0.00 | 0.00 | 0.00 | 0.00 | 0.315         |
| AVG        | 0.11 | 0.08 | 0.00 | 0.03 | 0.02 | 0.00 | 0.01 | 0.00 | 0.01 | 0.04 | 0.00 | 0.00 | 0.00 | 0.01 | 0.00 | 0.01 | 0.375         |
